# Supplementary material for: Integrated analysis and exploration of potential shared gene signatures between carotid atherosclerosis and periodontitis
Source: PubMed Central journal article supplement (PMC9620656; doi:10.1186/s12920-022-01373-y), 2022-10-31
Supplement: 12920_2022_1373_MOESM2_ESM.pdf [file 12920_2022_1373_MOESM2_ESM.pdf]

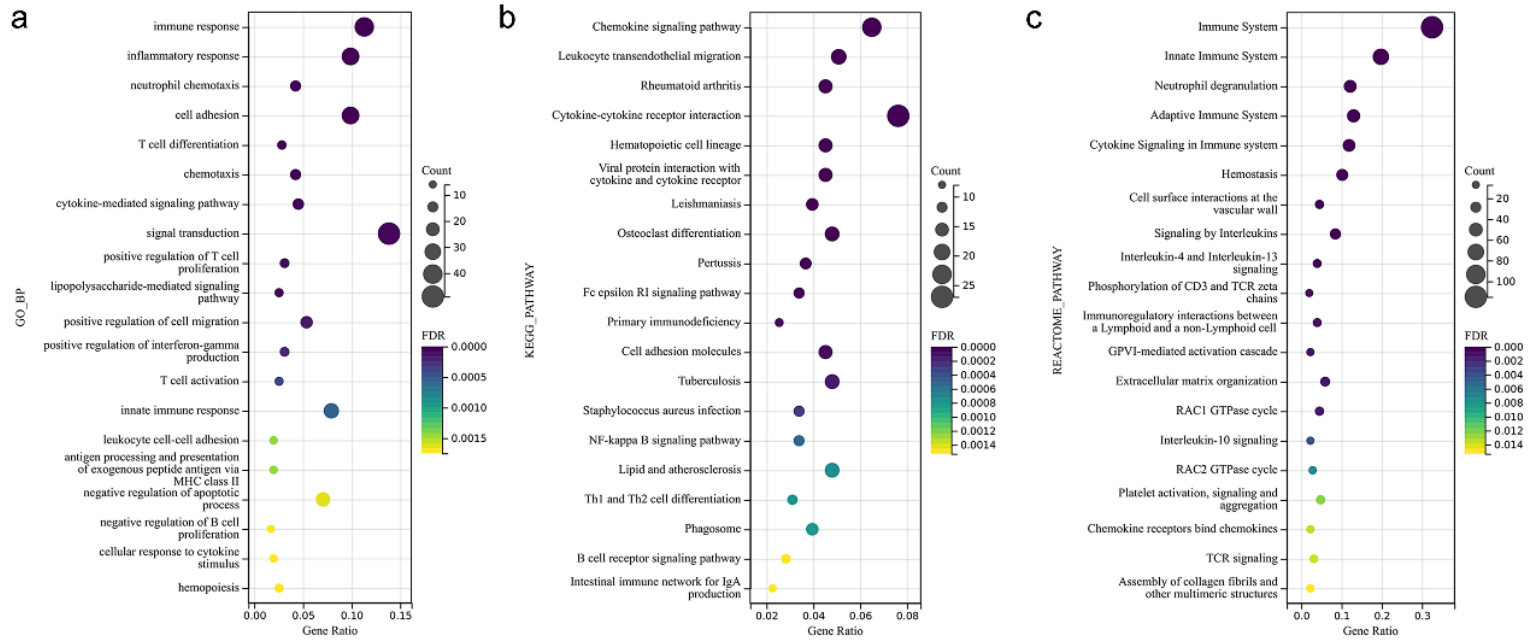

**Figure S1** Functional enrichment analysis of overlapping DEGs. (a) The top 20 significant enriched terms for Gene Ontology biological process (GO\_BP). (b) The top 20 significant enriched terms for Kyoto Encyclopedia of Genes and Genomes (KEGG) pathway. (c) The top 20 significant enriched terms for Reactome pathway.
